# Supplementary material for: Supramolecular self-assembly of a nitro-incorporating quinoxaline framework: insights into the origin of fluorescence turn-on response towards the benzene group of VOCs
Source: Royal Society of Chemistry journal article supplement (doi:10.1039/d1an01127h), 2021-01-01
Supplement: d1an01127h1.pdf [file d1an01127h1.pdf]

**Supramolecular Self-Assembly of Nitro-incorporated Quinoxaline  
Framework: Insights into the Origin of Fluorescence Turn-on Response  
towards Benzene group of VOCs**

Megha Basak,<sup>a</sup> Gopal Das\*<sup>a</sup>

<sup>a</sup> Department of Chemistry

Indian Institute of Technology Guwahati,

Assam 781039, India

E-mail: [gdas@iitg.ac.in](mailto:gdas@iitg.ac.in)

## Experimental Section

### General Information and Materials

All the reagents, solvents, starting materials, and different OVC analytes were procured from commercial purveyors and were used as received. All were of reagent grade. The solvents used were HPLC grade. For N.M.R. analyses, deuterated solvent [(CD<sub>3</sub>)<sub>2</sub>SO] was purchased from Sigma-Aldrich.

The UV-Visible absorption spectra were archived on a Perkin-Elmer Lambda-750 UV-Vis spectrophotometer using 10 mm path length quartz cuvettes in 250-700 nm wavelengths. Baseline correction was applied for all spectra.

Fluorescence emission spectra were documented on a Horiba Fluoromax-4 spectrofluorometer using a 1 cm path length of quartz cuvettes having a slit width of 3 nm at 298 K.

High-resolution mass spectrometry of **Probe 1** and **Probe 1-Mesitylene** was carried out on a Waters Q-ToF Premier mass spectrometer.

The solution-phase <sup>1</sup>H and <sup>13</sup>C Nuclear Magnetic Resonance spectra were recorded at 400 MHz using a Bruker Advances 400NMR instrument. The chemical shifts were reported in parts per million (ppm) with the deuterated solvents. The following abbreviations are used to delineate spin multiplicities in <sup>1</sup>H NMR spectra: s = singlet; d = doublet; t = triplet; q = quartet, m = multiplet.

### Synthesis of Probe 1

To a suspension of 4-nitro ortho-phenylene diamine (153.14 mg, 1 mmol) in 25 ml glacial acetic acid, isatin (176.41 mg, 1 mmol) was added portion-wise at room temperature. The reaction mixture was allowed to reflux overnight. After stirring for 24 hours, it was cooled to room temperature, and crushed ice was added slowly to get the precipitate. The precipitate was then filtered off and washed several times with methanol/acetic acid followed by ether to obtain the pure product.

**Probe 1**: brown solid (85% yield); HRMS (*m/z*): calculated for C<sub>14</sub>H<sub>8</sub>N<sub>4</sub>O<sub>2</sub> [M+H]<sup>+</sup>: 265.0726; found: 265.0723; <sup>1</sup>H NMR (600 MHz, DMSO-d<sub>6</sub>): 9.045 (s, 1H), 8.578 (s, 1H), 8.444 (d, 1H), 8.306 (d, 1H), 8.257 (d, 1H), 7.9561 (d, 1H), 7.698-7.660 (m, 1H), 7.382-7.349 (m, 1H); <sup>13</sup>C NMR (150 MHz, DMSO-d<sub>6</sub>): 148.61, 146.39, 145.00, 143.22, 138.16, 135.48, 133.76, 130.41, 125.21, 124.10, 116.63, 114.92, 111.91, 111.11; FT-IR (KBr pellets, cm<sup>-1</sup>):

3091(N-H stretching), 2924(C-H stretching), 1719(C-H bending), 1618(C=N), 1521(N-O asymmetric stretch), 1337(N-O symmetric stretch), 750(N-H wagging).

### General Procedure for UV-VIS and Fluorescence Spectroscopic Studies

Stock solutions of different VOCs ( $50 \times 10^{-3} \text{ mol L}^{-1}$ ) were prepared in DMSO. A stock solution of **Probe 1** ( $1 \times 10^{-3} \text{ mol L}^{-1}$ ) was prepared in DMSO. For fluorescence selectivity experiments, the solution of **Probe 1** was then diluted to  $2 \times 10^{-6} \text{ mol L}^{-1}$  with Millipore water by taking only 4  $\mu\text{L}$  of stock solution and making the final volume 2 mL. In fluorescence titration experiments, a quartz optical cell of 10mm pathlength was filled with a 2.0 mL solution of **Probe 1** to which various VOC's stock solutions were gradually added using a micropipette. For fluorescence measurements, **Probe 1** was excited at 400 nm, and emission was procured from 420 nm to 650 nm.

### Estimation of the Apparent Binding Constant

**Probe 1** with a sufficient concentration of 2  $\mu\text{M}$  in water was titrated with varying mesitylene concentrations. Thus the apparent binding constant for forming the **Probe 1**-mesitylene complex was assessed utilizing the Benesi–Hildebrand (B–H) plot (**Equation 1**).

$$1/(I-I_0) = 1/\{K(I_{\text{max}}-I_0) C\} + 1/(I_{\text{max}}-I_0) \quad (1)$$

$I_0$  is the emission intensity of **Probe 1** at maximum ( $\lambda = 481 \text{ nm}$ ), and  $I$  is the recorded emission intensity at that particular wavelength in the presence of a specific concentration of the analyte ( $C$ ).  $I_{\text{max}}$  is the maximum emission intensity value obtained at  $\lambda = 481 \text{ nm}$  during titration with varying analyte concentrations.  $K$  is the apparent binding constant ( $\text{M}^{-1}$ ) and was determined from the linear plot's slope.

### Detection Limit

The detection limit was evaluated based on the fluorescence titration changes for mesitylene. **Probe 1**'s fluorescence emission spectrum was computed ten times, and the standard deviation of the blank measurement was obtained. The fluorescence emission at 481 nm was plotted as a concentration of mesitylene to gain the slope. The detection limits were calculated using the following equation:

$$\text{Detection limit} = 3\sigma/k \quad (2)$$

where  $\sigma$  is the standard deviation of blank measurement, and  $k$  is the slope between the fluorescence emission intensity versus [mesitylene]. The conversion to ppm unit was done considering Mol. Wt. of mesitylene  $120.19 \text{ gmol}^{-1}$ .

### **Field Emission Scanning Electron Microscope (FESEM) Studies**

Morphology of **Probe 1**, **Probe 1**-mesitylene complex were imaged separately using Gemini 300 FESEM (Carl Zeiss) instrument. The samples were prepared by drop-casting (2 $\mu$ M), the DMSO/Water mixture on Al-foil wrapped coverslip, then coated with Au and dried under vacuum before the imaging.

### **Dynamic light scattering measurement**

Dynamic light scattering (D.L.S.) experiments were performed on Malvern Zetasizer Nano Z.S. instrument equipped with a 4.0 mW He–Ne laser running at a wavelength of 633 nm. The samples and the background were measured at room temperature (25 °C) at a scattering angle of 173°. D.L.S. experiments were executed with optically clear solutions of **Probe 1** (2  $\mu$ M) in water with 50 equivalents of mesitylene. The solution was equilibrated for 60 minutes before taking the measurements.

### **Fluorescence Microscopy**

The freshly prepared samples of **Probe 1** (2  $\mu$ M) and **Probe 1**-mesitylene complex (**Probe 1** mixed with 50 equivalents of mesitylene) glass slide and were entirely dried at room temperature, followed by image acquisition using a Fluorescence microscope (Eclipse Ti-U, Nikon, U.S.A.) with a blue filter.

### **Measurement of fluorescence lifetime**

Fluorescence lifetimes were evaluated utilizing the time-correlated single-photon counting (TCSPC) method in the Edinburgh Instrument Life-Spec II spectrometer. The samples (**Probe 1** and **Probe 1**-mesitylene) were excited at 400 nm keeping the emission wavelength at 481 nm using a pulsed diode laser. The fluorescence decays were surveyed by the re-convolution method using the FAST software provided by Edinburgh Instruments.

### **Photoluminescence Quantum Yield**

We had pursued the Petite Integrating Sphere method to determine the quantum yield by Horiba Jobin Yvon Fluoromax-4 Spectrofluorometer. It was determined in 100% aqueous medium for **Probe 1** (2  $\mu$ M) and **Probe 1**-mesitylene complex (**Probe 1** mixed with 50 equivalents of mesitylene), keeping  $\lambda_{ex}$  at 400 nm. To determine the quantum yield, the equation we employed was (as per the instruction written on the official website of Horiba),

$$\Phi = [(E_c - E_a) / (L_a - L_c)] \quad (3)$$

Where  $E_c$  = Emission of the sample,  $E_a$  = Emission of the blank,  $L_c$  = Scatter of the sample &  $L_a$  = Scatter of the blank.

### **Theoretical investigations (DFT study)**

DFT optimizations of **Probe 1** and **Probe 1**-mesitylene complex were accomplished with the RB3LYP/ 6-31G (d,p) method basis set using the Gaussian 09 program.

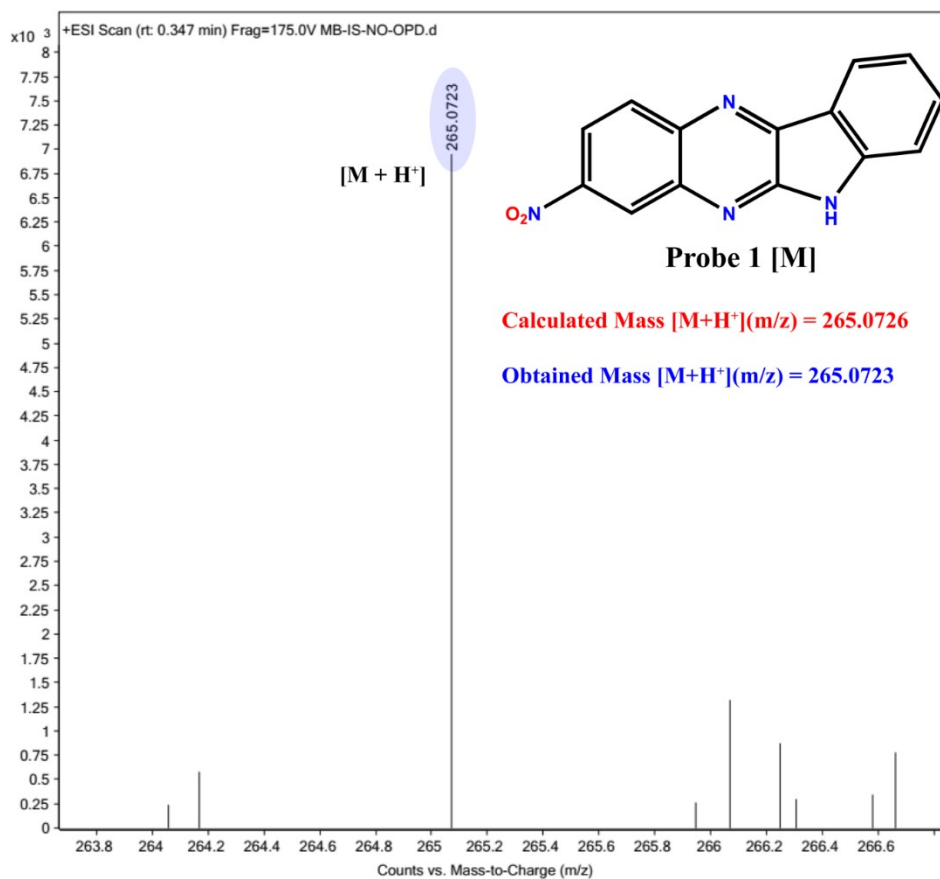

**Figure S1:** HRMS spectra of **Probe 1** in 1:1 water-acetonitrile in positive ionization mode.

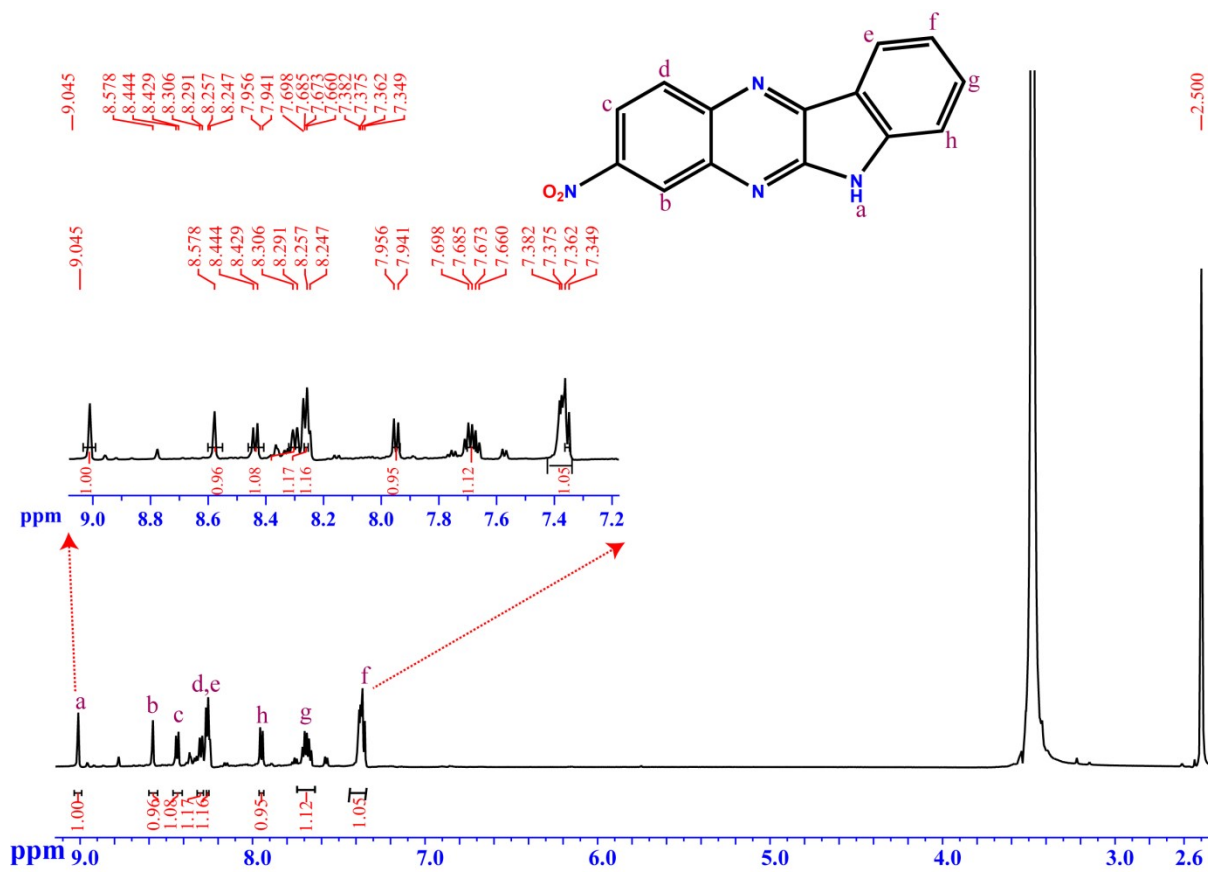

**Figure S2:**  $^1\text{H}$  N.M.R. of Probe 1 in DMSO- $\text{d}_6$  at room temperature.

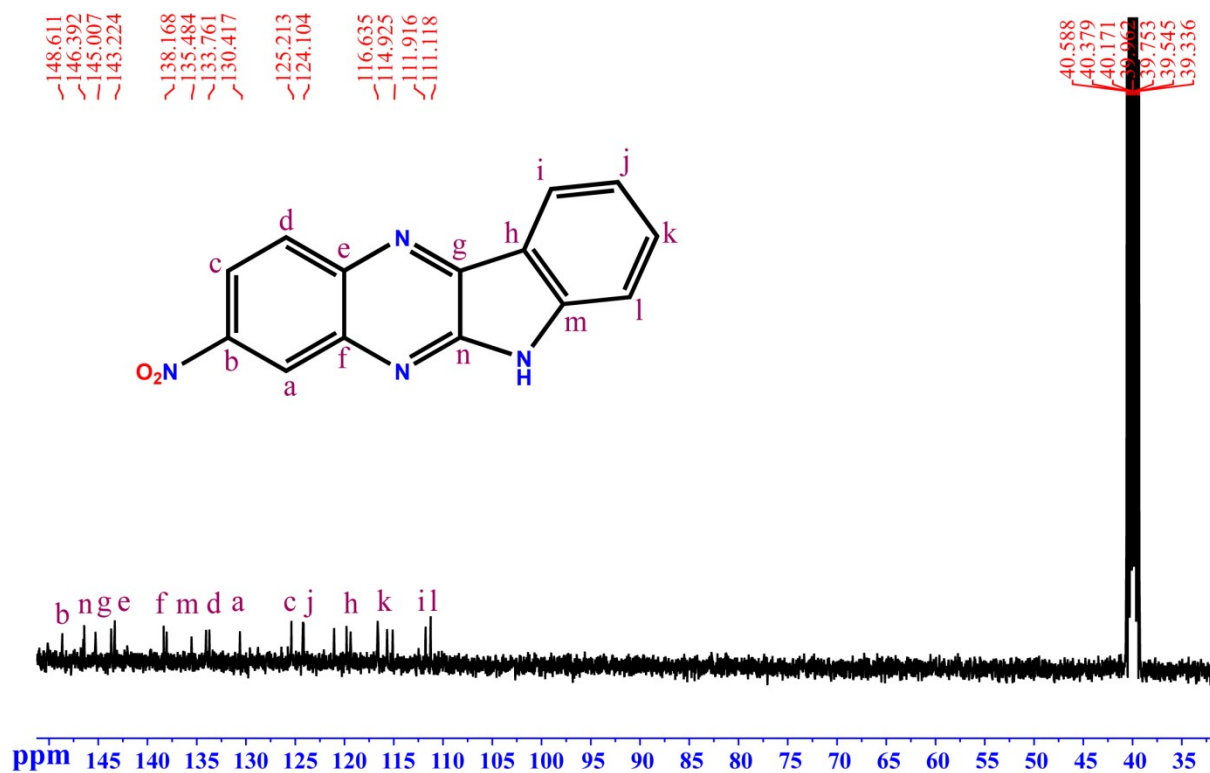

**Figure S3:**  $^{13}\text{C}$  N.M.R. of **Probe 1** in DMSO- $\text{d}_6$  at room temperature.



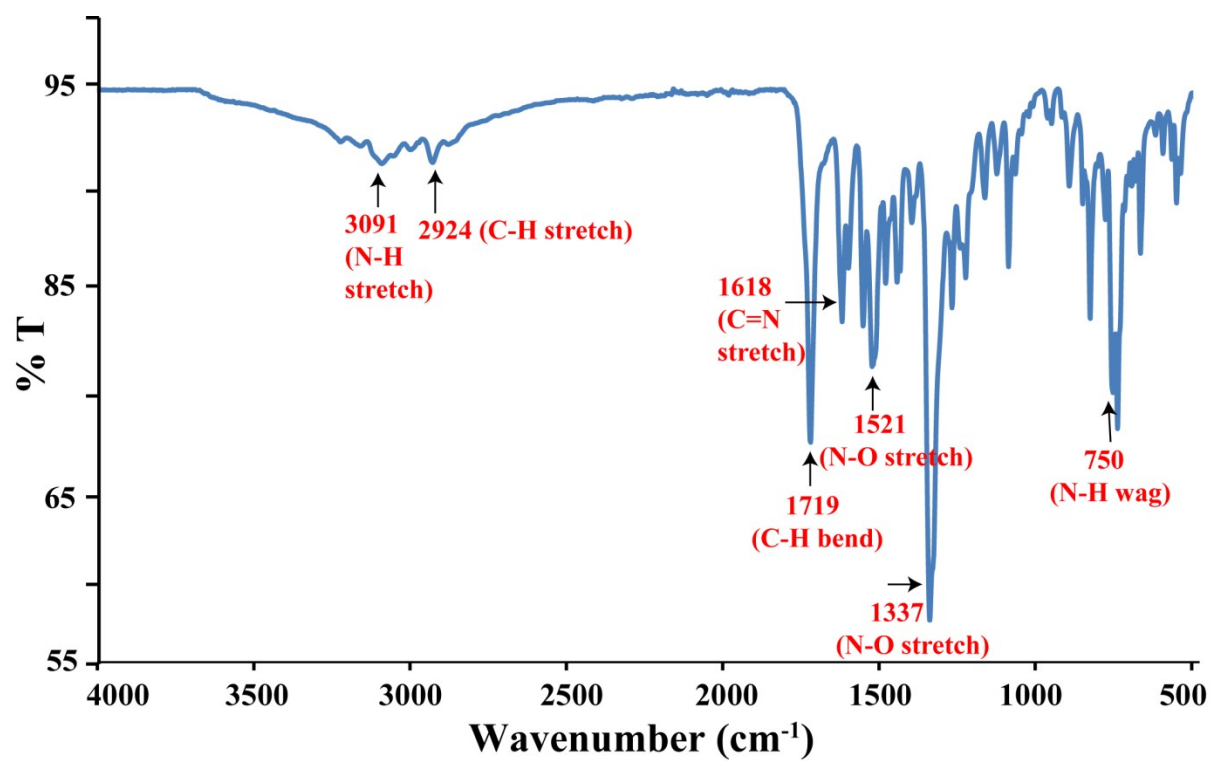

**Figure S4:** FTIR spectrum of **Probe 1** recorded in KBr pellet at room temperature.

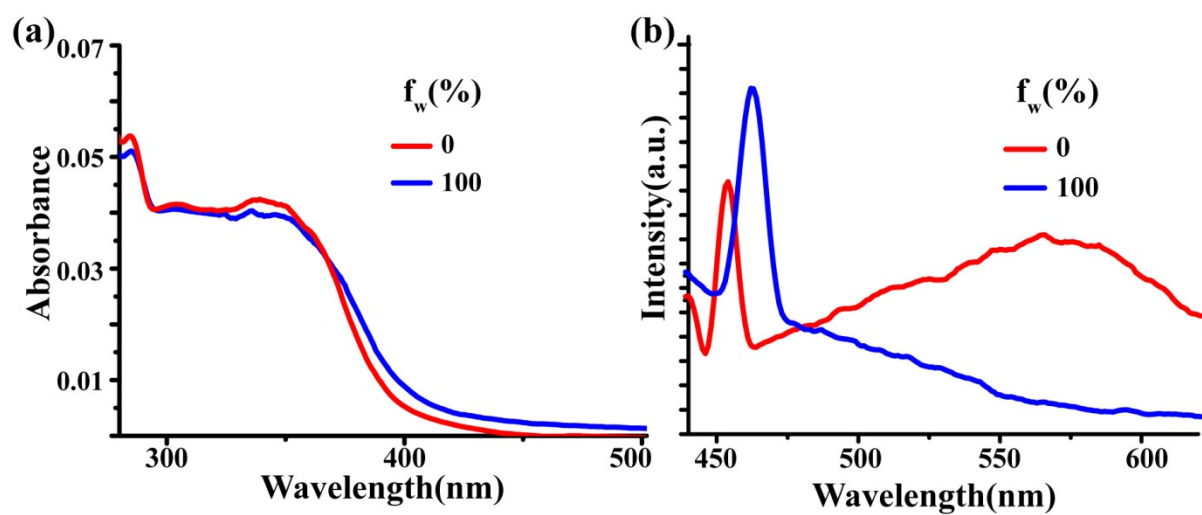

**Figure S5:** (a) UV-Vis and (b) Fluorescence changes of **Probe 1** (2  $\mu\text{M}$ ) in different water fractions at room temperature.

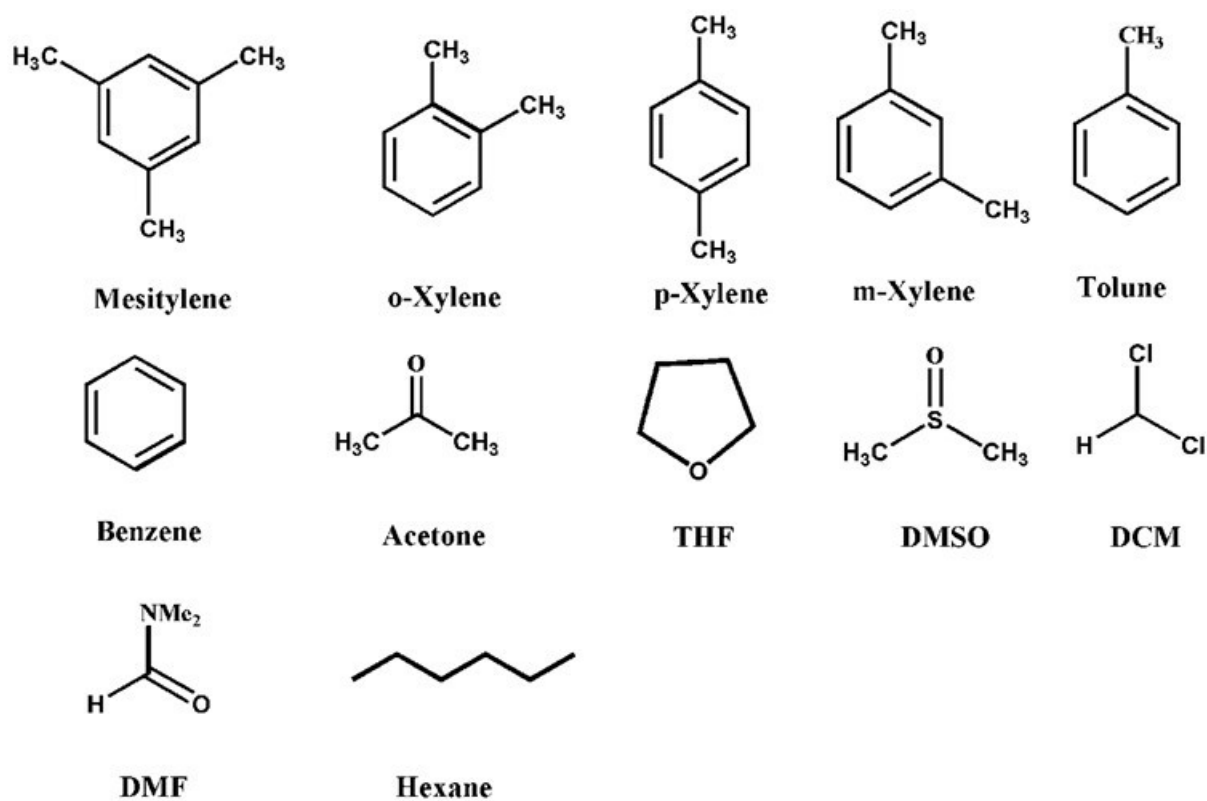

**Figure S6:** Chemical structures of different aromatic and non-aromatic V.O.C. compounds used in our study.

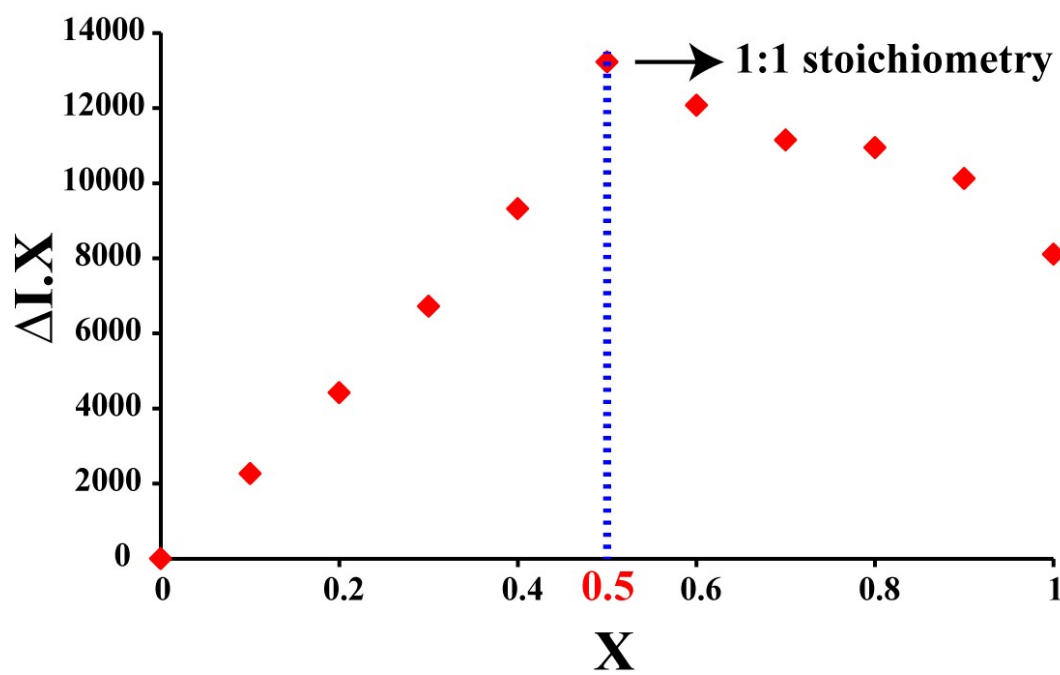

**Figure S7:** Job's plot calculation to determine the binding stoichiometry between **Probe 1** and Mesitylene in 100% solution ( $\lambda_{\text{ex}} = 400 \text{ nm}$ ).

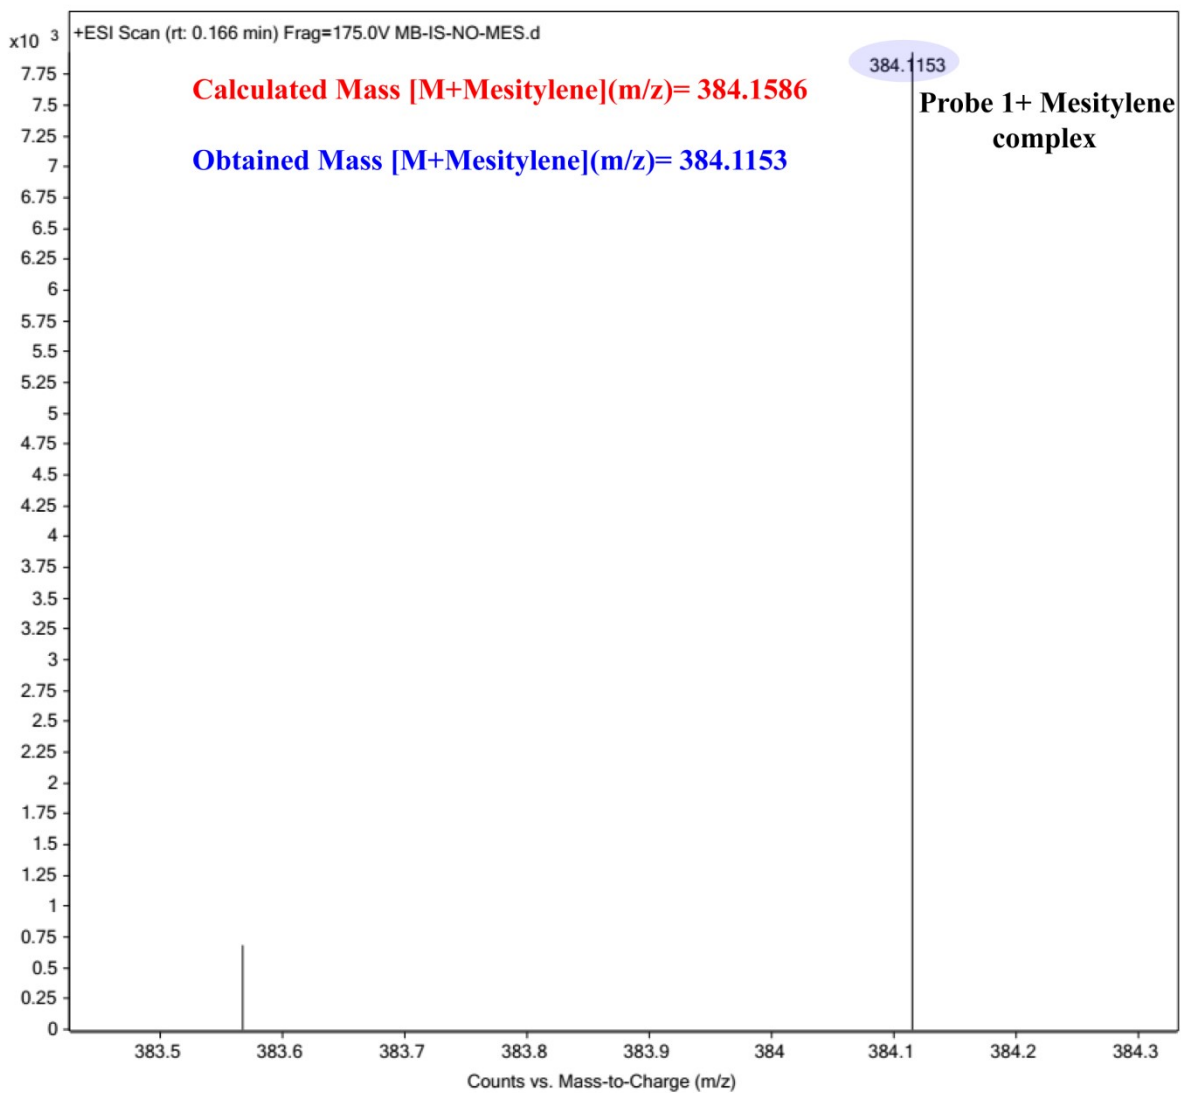

**Figure S8:** HRMS spectra of **Probe 1** in 1:1 water-acetonitrile in the presence of Mesitylene in positive ionization mode.

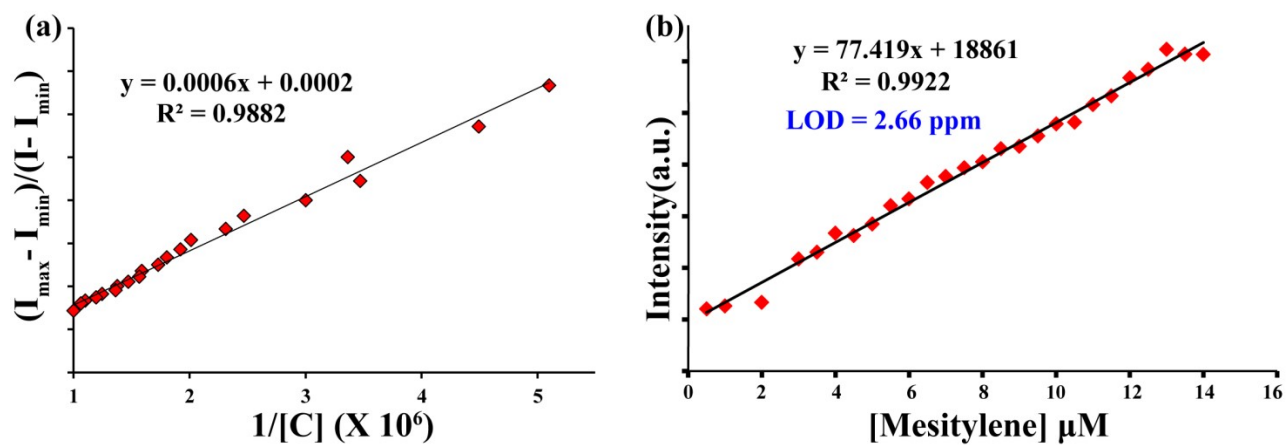

**Figure S9:** (a) Determination of binding constant of **Probe 1** for Mesitylene in aqueous medium using the Benesi-Hildebrand method considering 1:1 interaction. (b) Fluorescence emission intensity of **Probe 1** at 481 nm vs. Mesitylene concentration to calculate the detection limit.

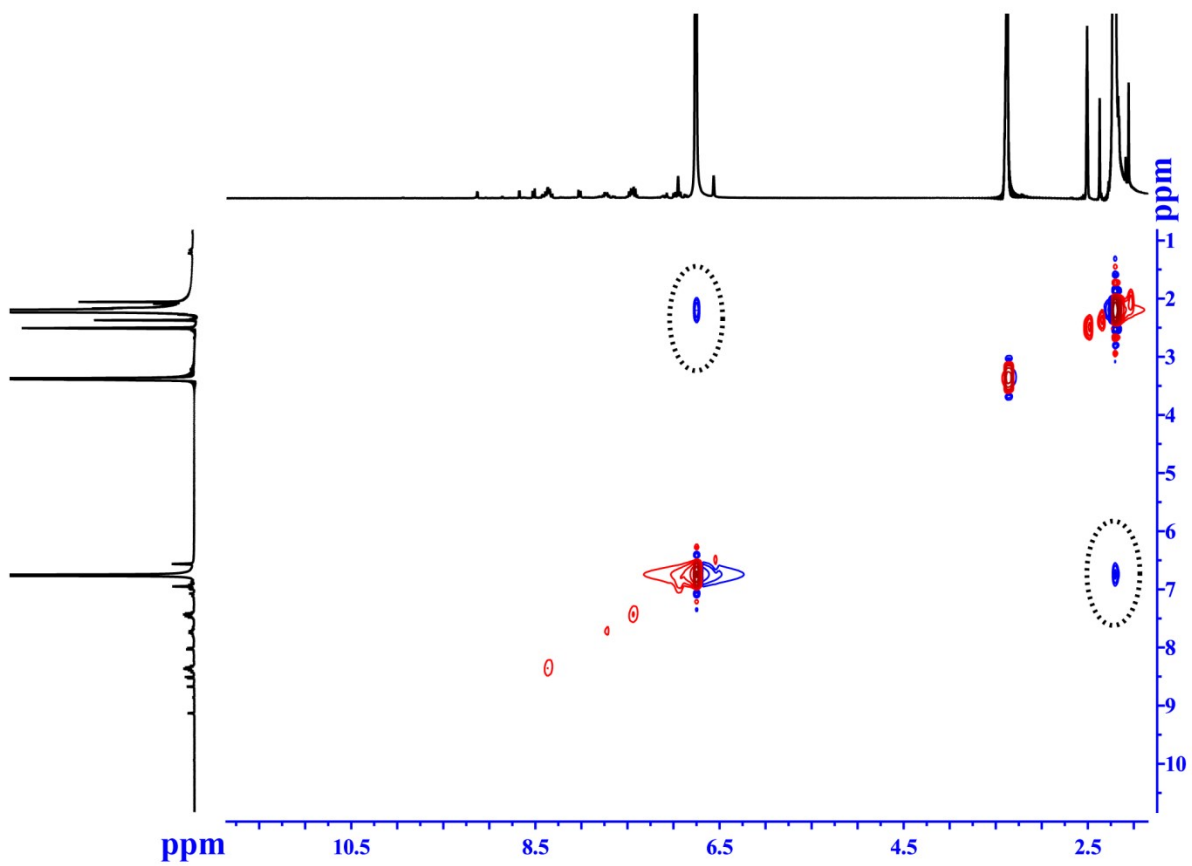

**Figure S10:** NOESY NMR spectra of **Probe 1**-Mesitylene.

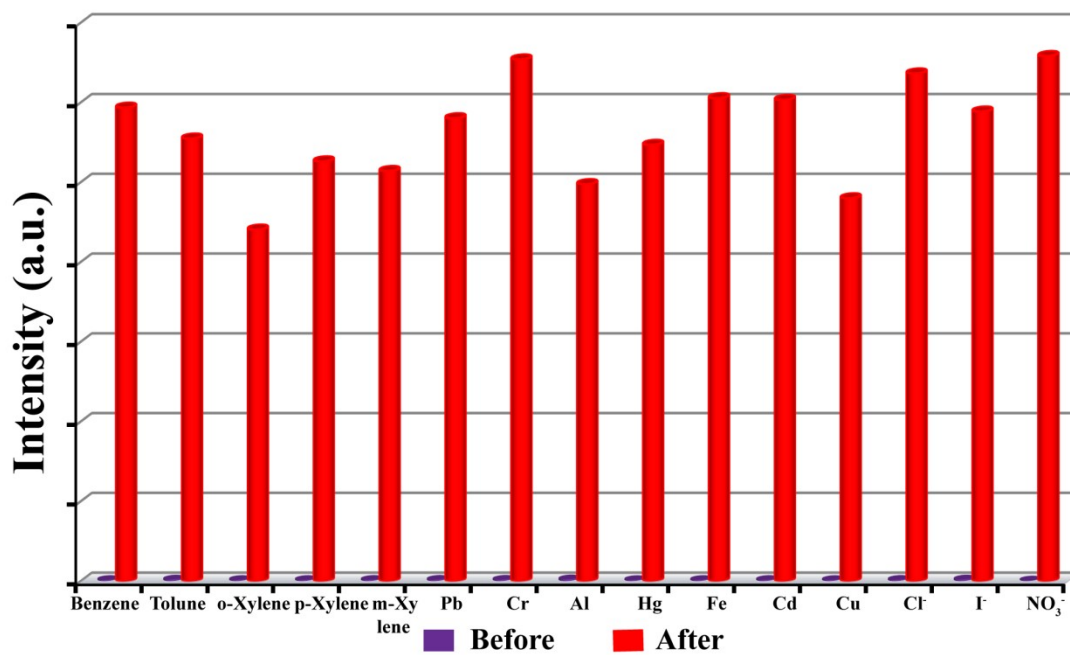

**Figure S11:** Fluorescence response of **Probe 1** ( $2\mu\text{M}$ ) to various analytes, before (violet bars) and after (red bars) addition of Mesitylene.



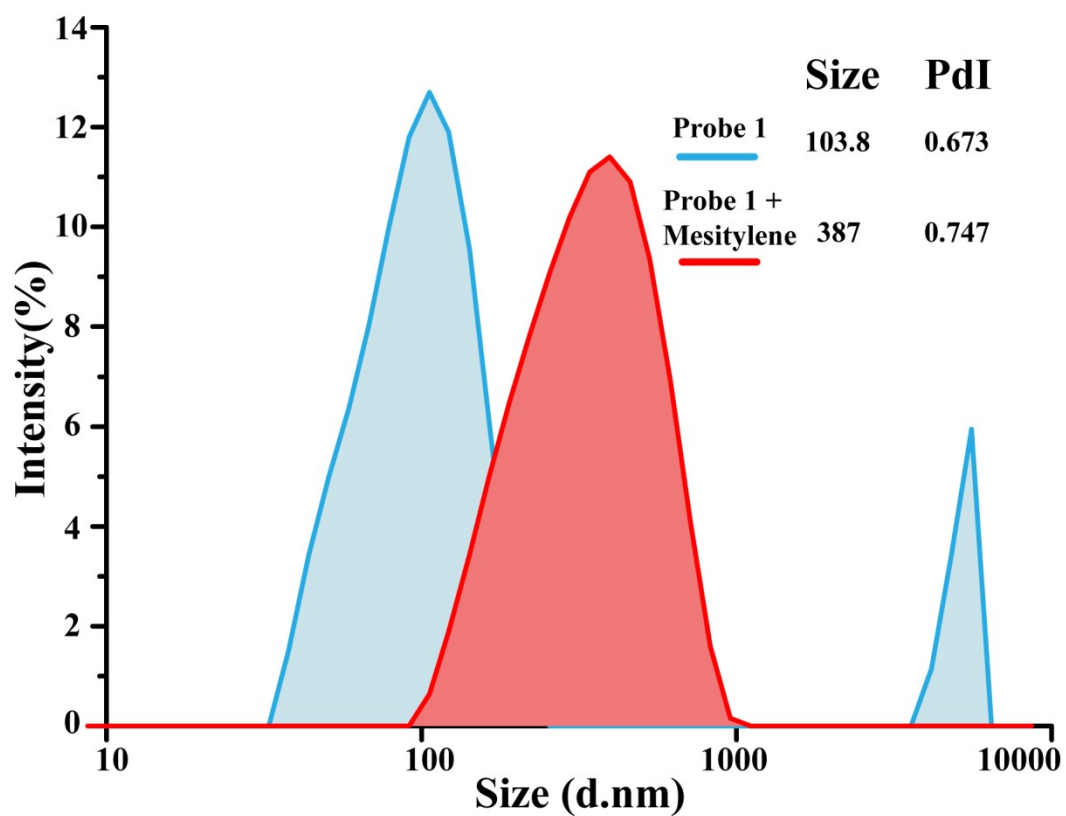

**Figure S12.** D.L.S. spectra of **Probe 1**(2  $\mu\text{M}$ ) and **Probe 1 + Mesitylene** in the aqueous medium.

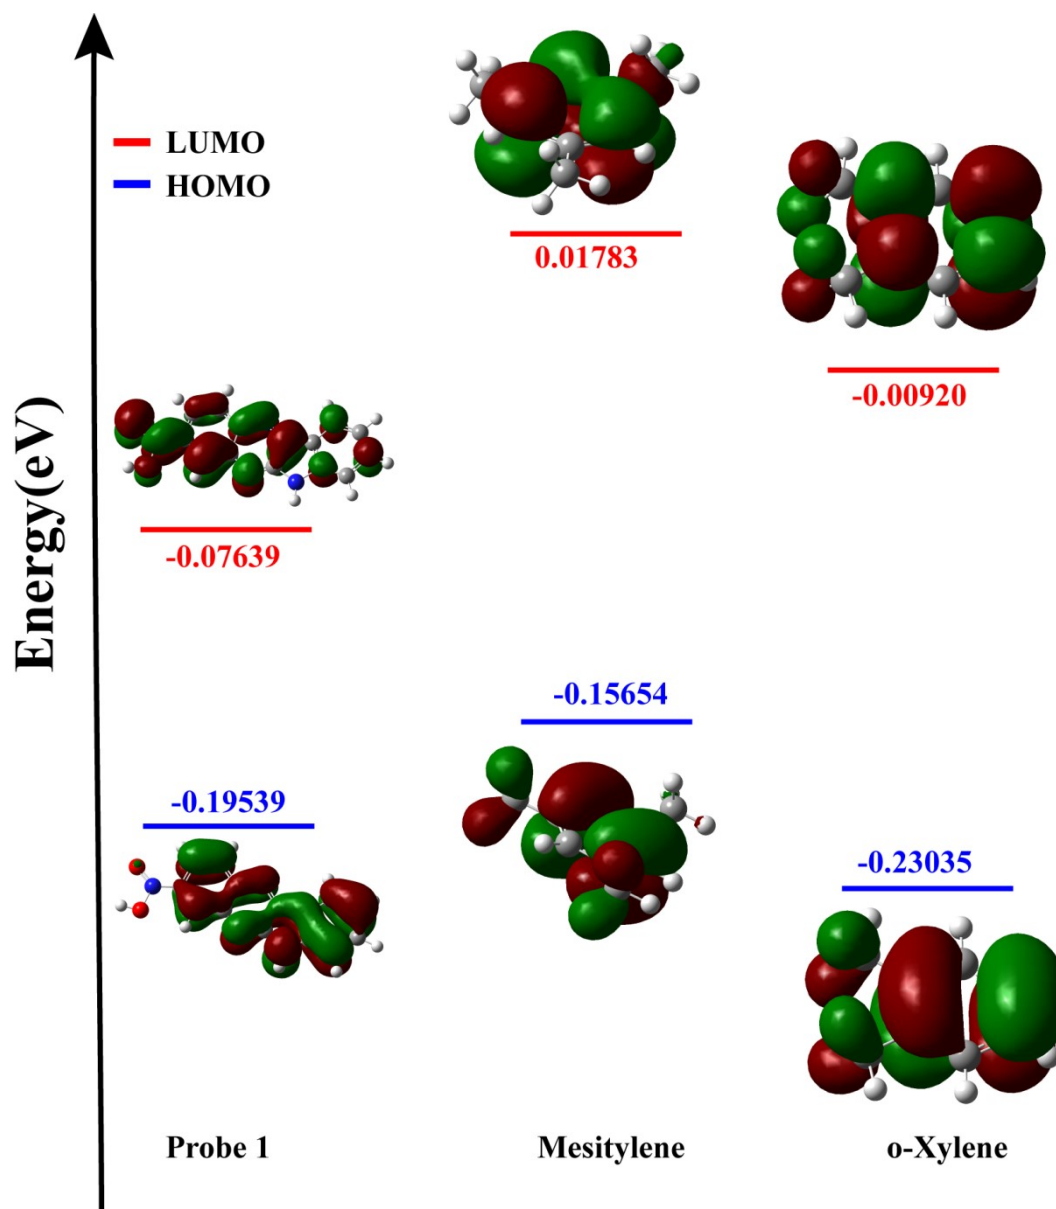

**Figure S13:** DFT calculated HOMO-LUMO energy profiles of **Probe 1**, Mesitylene and o-Xylene.

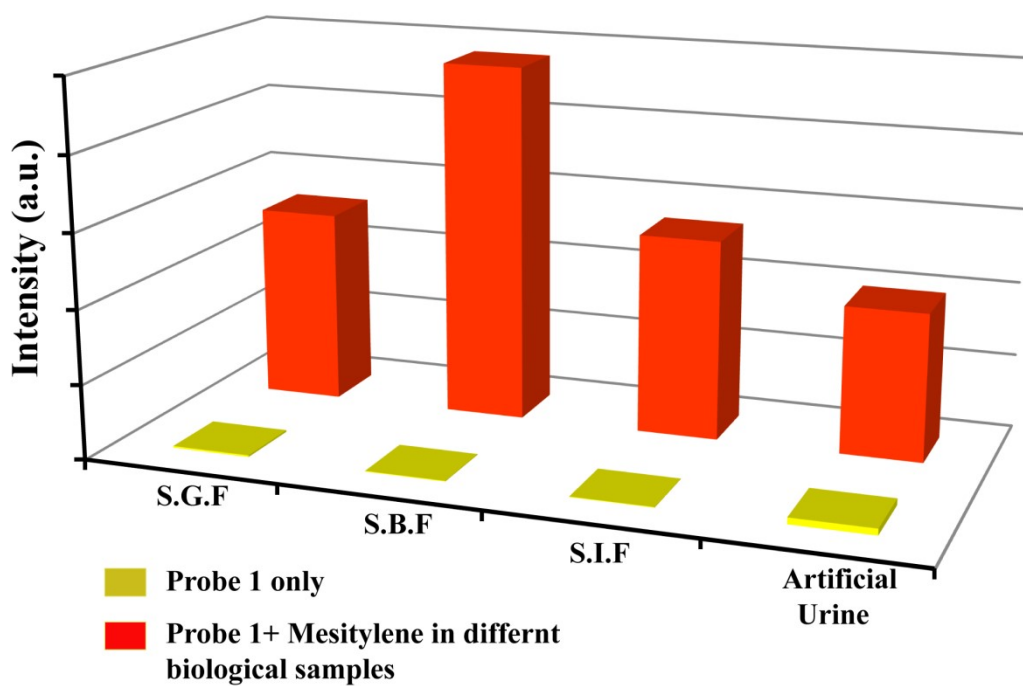

**Figure S14:** Changes in the emission intensity of **Probe 1** (2  $\mu\text{M}$ ) at 481 nm in the presence of excess Mesitylene in bio-fluidic samples [S.G.F- Simulated Gastric Fluid (pH~2.0), S.B.F- Simulated Body Fluid (pH~7.4), S.I.F- Simulated Intestinal Fluid (pH~8.0) and Artificial Urine].

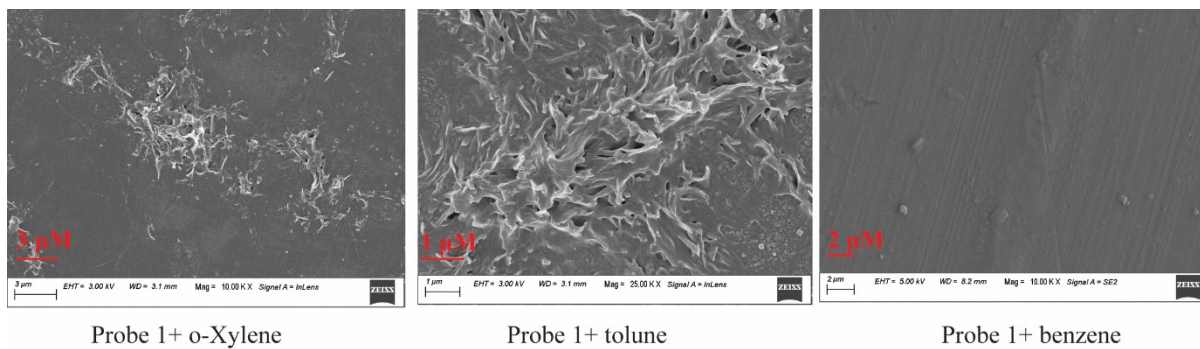

**Figure S15:** FESEM images of **Probe 1** with different VOCs.

**Table S1:** Fluorescence lifetime values of **Probe 1** (2 $\mu$ M) and **Probe 1-Mesitylene** in aqueous medium.

| Sample                         | $B_1$  | $B_2$  | $B_3$  | $a_1$  | $a_2$  | $a_3$  | $\tau_1$ | $\tau_2$ | $\tau_3$ | $\langle\tau\rangle$<br>(ns) | $\chi^2$ |
|--------------------------------|--------|--------|--------|--------|--------|--------|----------|----------|----------|------------------------------|----------|
| <b>Probe 1</b>                 | 0.0198 | 2.0809 | -      | 0.7220 | 0.2779 | -      | 0.818    | 0.003    | -        | 0.591                        | 1.089    |
| <b>Probe 1+<br/>Mesitylene</b> | 0.0836 | 0.0153 | 0.0018 | 0.6667 | 0.2465 | 0.0866 | 1.136    | 2.290    | 6.955    | 1.924                        | 1.024    |

**Table S2:** Comparative analysis for detection of Mesitylene in natural water samples.

| <b>Sample</b>         | <b>Fluorescence Spectroscopy</b>        |                                            |                     | <b>UV-Visible Spectroscopy</b>          |                                            |                     |
|-----------------------|-----------------------------------------|--------------------------------------------|---------------------|-----------------------------------------|--------------------------------------------|---------------------|
|                       | <b>Added (<math>\mu\text{M}</math>)</b> | <b>Detected (<math>\mu\text{M}</math>)</b> | <b>Recovery (%)</b> | <b>Added (<math>\mu\text{M}</math>)</b> | <b>Detected (<math>\mu\text{M}</math>)</b> | <b>Recovery (%)</b> |
| Industrial wastewater | 5.0                                     | 5.30                                       | 103                 | 5.0                                     | 6                                          | 105                 |
| Lake water            | 5.0                                     | 4.00                                       | 85                  | 5.0                                     | 4.8                                        | 88                  |
| River water           | 5.0                                     | 4.8                                        | 93                  | 5.0                                     | 5.1                                        | 101                 |

**Table S3:** Comparison of the detection limits achieved till now along with the receptor and solvent system used for the detection of VOCs

| SI No. | References                                          | Receptor                                                     | Analytical Methods        | Medium Used                             | L.O.D. (ppm) |
|--------|-----------------------------------------------------|--------------------------------------------------------------|---------------------------|-----------------------------------------|--------------|
| 1.     | Present work                                        | Quinoxaline derivative                                       | Fluorescence Spectroscopy | 100% Aqueous medium, Vapor, Paper Strip | 2.66         |
| 2.     | Sensors & Actuators: B. Chemical, 2020, 311, 127904 | Poly(maleic anhydride-alt-1-octadecene) (PMAO) nanoparticles | Fluorescence Spectroscopy | Aqueous medium                          | 7            |
| 3.     | Chem. Sci., 2018, 9, 1892–1901                      | Organoboron polymer                                          | Fluorescence Spectroscopy | Vapor                                   | 3.7          |
| 4.     | Molecules 2017, 22, 1306                            | Polystyrene films                                            | Fluorescence Spectroscopy | Vapor                                   | 150          |
| 5.     | Anal. Chem., 2017, 89, 3814                         | Perylene monoimide                                           | Fluorescence Spectroscopy | Vapor                                   | 8            |
| 6.     | Chem. Mater. 2016, 28, 7889                         | TPE based M.O.F.                                             | Fluorescence Spectroscopy | Solution                                | -            |
| 7.     | Scientific Reports, 2015, 5, 12462                  | Molecularly imprinted polymer                                | Potentiometry             | Vapor                                   | 3.5          |
| 8.     | J. Am. Chem. Soc. 2014, 136, 7241                   | 2D M.O.F.                                                    | Fluorescence Spectroscopy | Solution                                | -            |
| 9.     | Chem. Mater. 2015, 27, 1465                         | Coordination Polymer                                         | Raman Spectroscopy        | Solution/ Vapor                         | 500          |
| 10.    | Chem. Commun., 2011, 47, 1160–1162                  | Silver(I) pyrazolate                                         | Fluorescence Spectroscopy | Vapor                                   | -            |
